# Supplementary material
Source: HighWire-hosted journal article supplement (https://emj.bmj.com/content/emermed-2016-205983)
Supplement: inline-supplementary-material-1 [file inline-supplementary-material-1.pdf]

## **Appendix to: The Troponin-only Manchester Acute Coronary**

### **Syndromes (T-MACS) Decision Rule: Derivation and Validation**

#### **Other analyses published from these cohorts:**

1. Body R, Carley S, Wibberley C, McDowell G, Ferguson J, Mackway-Jones K. The value of symptoms and signs in the emergent diagnosis of acute coronary syndromes. *Resuscitation*. 2010;81(2):281–6.
2. Body R, McDowell G, Carley S, Mackway-Jones K. Do risk factors for chronic coronary heart disease help diagnose acute myocardial infarction in the Emergency Department? *Resuscitation*. 2008;79:41–5.
3. Body R, Carley S, McDowell G, Pemberton P, Burrows G, Cook G, et al. The Manchester Acute Coronary Syndromes (MACS) decision rule for suspected cardiac chest pain: derivation and external validation. *Heart*. 2014;100:1462–8.
4. Body R, McDowell G, Carley S, Wibberley C, Ferguson J, Mackway-Jones K. A FABP-ulous “rule out” strategy? Heart fatty acid binding protein and troponin for rapid exclusion of acute myocardial infarction. *Resuscitation*. 2011 Aug;82(8):1041–6.
5. Body R, Pemberton P, Ali F, McDowell G, Carley S, Smith A, et al. Low soluble P-selectin may facilitate early exclusion of acute myocardial infarction. *Clin Chim Acta*. 2011 Mar 18;412(7-8):614–8.
6. Body R, Carley S, McDowell G, Ferguson J, Mackway-Jones K. Can a modified thrombolysis in myocardial infarction risk score outperform the original for risk stratifying emergency department patients with chest pain? *Emergency Medicine Journal*. 2009;26:95–9.
7. Body R, Burrows G, Carley S, Lewis PS, Jarvis J. The Manchester Acute Coronary Syndromes (MACS) decision rule: validation with a new automated assay for heart-type fatty acid binding protein. *Emergency Medicine Journal* [Internet]. 2014 Dec 24 [cited 2015 Feb 27]; Available from: <http://emj.bmj.com/cgi/doi/10.1136/emered-2014-204235>
8. Body R, Lewis PS, Carley S, Burrows G, Haves B, Cook G. Chest pain: if it hurts a lot, is heart attack more likely? *European Journal of Emergency Medicine*. 2014 Oct;[Online first]:1.
9. Body R, Cook G, Burrows G, Carley S, Lewis PS, Jarvis J, et al. Can emergency physicians “rule in” and “rule out” acute myocardial infarction with clinical judgement? *Emergency Medicine Journal*. 2014 Jul 12;31:872–6.
10. Carlton EW, Cullen L, Than M, Gamble J, Khattab A, Greaves K. A novel diagnostic protocol to identify patients suitable for discharge after a single high-sensitivity troponin. *Heart* [Internet].

2015 Feb 17 [cited 2015 Mar 5]; Available from: <http://heart.bmj.com/cgi/doi/10.1136/heartjnl-2014-307288>

11. Carlton EW, Khattab A, Greaves K. Identifying Patients Suitable for Discharge After a Single-Presentation High-Sensitivity Troponin Result: A Comparison of Five Established Risk Scores and Two High-Sensitivity Assays. *Ann Emerg Med*. 2015 Dec;66(6):635–645.e1.
12. Carlton EW, Than M, Cullen L, Khattab A, Greaves K. “Chest pain typicality” in suspected acute coronary syndromes and the impact of clinical experience. *Am J Med*. 2015 Oct;128(10):1109–1116.e2.
13. Carlton E, Body R, Greaves K. External Validation of the Manchester Acute Coronary Syndromes Decision Rule. Smith S, editor. *Academic Emergency Medicine*. 2016 Feb;23(2):136–43.
14. Mueller M, Biener M, Vafaie M, Doerr S, Keller T, Blankenberg S, et al. Absolute and Relative Kinetic Changes of High-Sensitivity Cardiac Troponin T in Acute Coronary Syndrome and in Patients with Increased Troponin in the Absence of Acute Coronary Syndrome. *Clinical Chemistry*. 2011 Dec 1;58(1):209–18.

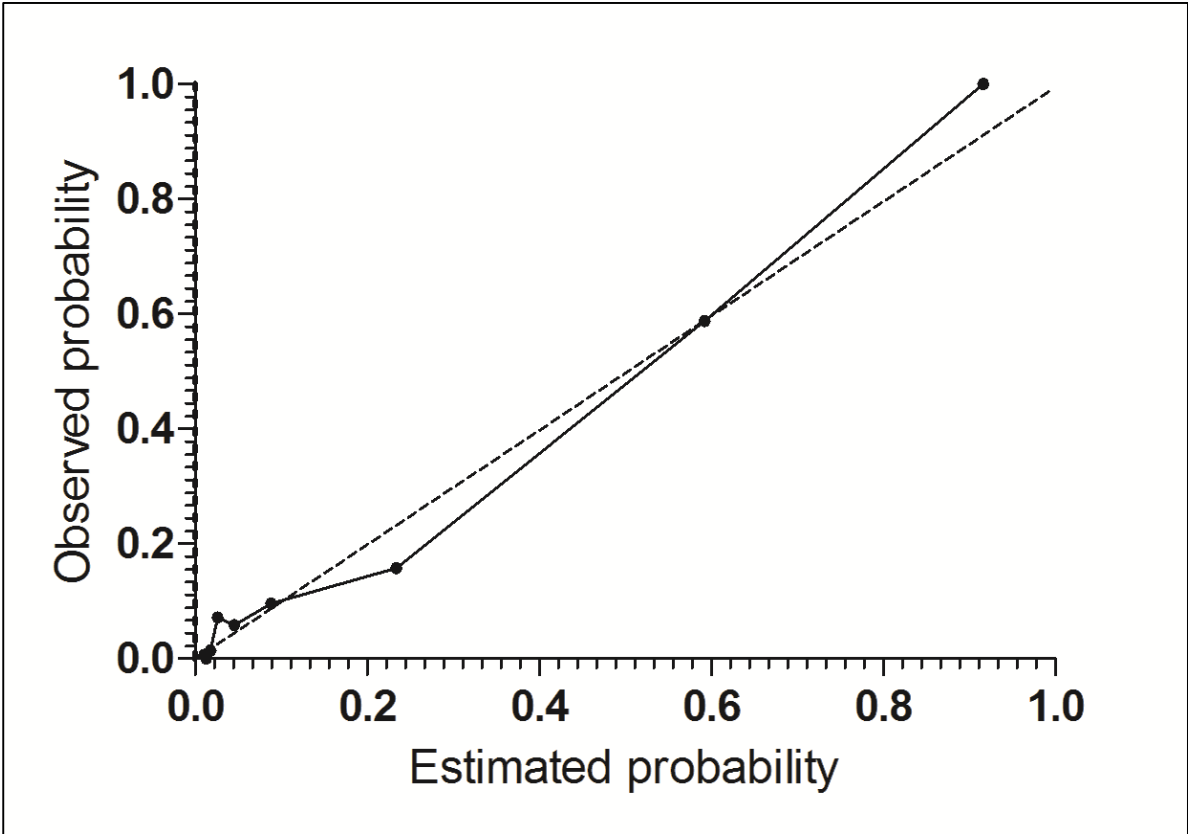

Supplementary Figure 1: Calibration plot of observed versus expected probability for the refined T-MACS rule, stratified into deciles

**Supplementary Table 1: Full details of the inclusion and exclusion criteria for each study**

| Study                           | Inclusion criteria                                                                                                                                                                    | Exclusion criteria                                                                                                                                                                                                                                                                                                                                                                                                                                                                                                                                                                 |
|---------------------------------|---------------------------------------------------------------------------------------------------------------------------------------------------------------------------------------|------------------------------------------------------------------------------------------------------------------------------------------------------------------------------------------------------------------------------------------------------------------------------------------------------------------------------------------------------------------------------------------------------------------------------------------------------------------------------------------------------------------------------------------------------------------------------------|
| Derivation study (Manchester)   | Adults (>25 years) presenting to the Emergency Department (ED) with suspected cardiac chest pain occurring within the last 24 hours                                                   | Another medical condition requiring hospital admission; renal failure needing dialysis; significant chest trauma with suspicion of myocardial contusion; pregnancy; unable to speak English; prisoners                                                                                                                                                                                                                                                                                                                                                                             |
| Validation study 1 (Stockport)  |                                                                                                                                                                                       |                                                                                                                                                                                                                                                                                                                                                                                                                                                                                                                                                                                    |
| Validation study 2 (Manchester) | Adults (>16 years) presenting to the ED with suspected cardiac chest pain occurring within the last 12 hours                                                                          |                                                                                                                                                                                                                                                                                                                                                                                                                                                                                                                                                                                    |
| Validation study 3 (Poole)      | Patients aged >18 years with at least 5 minutes of chest pain suggestive of an acute coronary syndrome, for whom the attending physician determined inpatient evaluation was required | ST elevation myocardial infarction; ECG changes diagnostic of ischaemia; arrhythmias (new-onset atrial fibrillation, atrial flutter, sustained supraventricular tachycardia, second degree or complete heart block, or sustained or recurrent ventricular tachyarrhythmias); age ≥80 years; atypical symptoms in the absence of chest discomfort; a clear non-acute coronary syndrome cause identified at presentation; another medical condition requiring hospital admission; unable to speak English; renal failure needing dialysis; inability to be contacted after discharge |

NB: All patients were also required to provide written informed consent for inclusion in any of the four studies. Thus patients lacking capacity to provide written informed consent were excluded.

**Supplementary Table 2: Details of the assay and delta criteria used to adjudicate acute myocardial infarction in each study**

| <b>Study</b>              | <b>Criteria for establishing a rise and/or fall</b>                                       | <b>Timing of tests</b>                            | <b>Assay used for adjudication of AMI</b>                                                                                                       |
|---------------------------|-------------------------------------------------------------------------------------------|---------------------------------------------------|-------------------------------------------------------------------------------------------------------------------------------------------------|
| Derivation (Manchester)   | Absolute change of at least 20ng/L (based on the analytical characteristics of the assay) | Admission and $\geq 12$ hours after peak symptoms | Roche 4 <sup>th</sup> generation cTnT (contemporary assay). 99 <sup>th</sup> percentile 10ng/L; co-efficient of variation <10% at 30ng/L        |
| Validation 1 (Stockport)  | Absolute change of at least 9.2ng/L (1)                                                   |                                                   | Roche 5 <sup>th</sup> generation hs-cTnT (high sensitivity assay). 99 <sup>th</sup> percentile 14ng/L; co-efficient of variation <10% at 13ng/L |
| Validation 2 (Manchester) |                                                                                           |                                                   |                                                                                                                                                 |
| Validation 3 (Poole)      | Relative change of at least 20%                                                           | Admission and $\geq 6$ hours after peak symptoms  |                                                                                                                                                 |

Supplementary Table 3: Proportion of patients with AMI and ACS in each individual validation cohort

|                     |                              | Very low risk | Low risk   | Moderate risk | High risk |
|---------------------|------------------------------|---------------|------------|---------------|-----------|
| Validation cohort 1 | Total number of patients (%) | 143 (31.0)    | 80 (17.3)  | 198 (42.9)    | 41 (8.9)  |
|                     | Number (%) with AMI          | 0 (0.0)       | 1 (1.3)    | 38 (19.2)     | 40 (97.6) |
|                     | Number (%) with MACE         | 0 (0.0)       | 2 (2.5)    | 52 (26.3)     | 40 (97.6) |
| Validation cohort 2 | Total number of patients (%) | 85 (44.5)     | 25 (13.1)  | 66 (34.6)     | 15 (7.9)  |
|                     | Number (%) with AMI          | 1 (1.2)       | 0 (0.0)    | 14 (21.2)     | 14 (93.3) |
|                     | Number (%) with MACE         | 1 (1.2)       | 4 (16.0)   | 18 (27.3)     | 14 (93.3) |
| Validation cohort 3 | Total number of patients (%) | 362 (44.9)    | 277 (34.4) | 154 (19.1)    | 13 (1.6)  |
|                     | Number (%) with AMI          | 1 (0.3)       | 13 (4.7)   | 41 (26.6)     | 9 (69.2)  |
|                     | Number (%) with MACE         | 3 (0.8)       | 18 (6.5)   | 51 (33.1)     | 9 (69.2)  |

Supplementary Table 4: Diagnostic performance of the T-MACS rule in each individual validation cohort for ACS

|                           | Validation cohort 1  | Validation cohort 2 | Validation cohort 3 |
|---------------------------|----------------------|---------------------|---------------------|
| Sensitivity               | 100.0 (96.2 – 100.0) | 97.3 (85.8 – 99.9)  | 96.3 (89.6 – 99.2)  |
| Specificity               | 38.9 (33.9 – 44.1)   | 54.6 (46.3 – 62.6)  | 49.7 (46.0 – 53.4)  |
| Positive predictive value | 29.5 (24.5 – 34.8)   | 34.0 (25.0 – 43.8)  | 17.6 (14.1 – 21.4)  |
| Negative predictive value | 100.0 (97.5 – 100.0) | 98.8 (93.6 – 100.0) | 99.2 (97.6 – 99.8)  |
| Positive likelihood ratio | 1.64 (1.51 – 1.77)   | 2.14 (1.79 – 2.57)  | 1.92 (1.76 – 2.08)  |
| Negative likelihood ratio | 0.00                 | 0.05 (0.01 – 0.34)  | 0.07 (0.02 – 0.23)  |

**Supplementary Table 5: Results of the paired comparison between T-MACS and the LoD strategy**

|             | LoD strategy           | T-MACS                 | Absolute difference (95% CI), p value* |
|-------------|------------------------|------------------------|----------------------------------------|
| Sensitivity | 98.1%<br>(95.2 – 99.5) | 98.1%<br>(95.2 – 99.5) | 0.0% (-2.2 – 2.2)<br>p=1.00            |
| Specificity | 37.2%<br>(34.5 – 40.0) | 47.0%<br>(44.2 – 49.8) | 9.8% (6.7 – 12.7)<br>p<0.0001          |
