# Supplementary material
Source: HighWire-hosted journal article supplement (https://emj.bmj.com/content/emermed-2016-205983)
Supplement: inline-supplementary-material-2 [file inline-supplementary-material-2.pdf]

Supplementary Material: Examples of the T-MACS rule output

| T-MACS Rule Calculator (Example)                                                                                                                        |                                                                 |
|---------------------------------------------------------------------------------------------------------------------------------------------------------|-----------------------------------------------------------------|
| T-MACS RULE CALCULATOR: INSERT DATA IN CELLS B5 TO B11                                                                                                  |                                                                 |
| <i>The T-MACS model is designed to assist a clinician rather than being directive</i>                                                                   |                                                                 |
| CAUTION: This example of a T-MACS calculator is for demonstration purposes and is not designed for clinical use                                         |                                                                 |
|                                                                                                                                                         | INPUT (USE DROP DOWN LISTS AND ENTER NUMBER FOR TROPONIN LEVEL) |
| Is the ECG compatible with acute ischaemia? *                                                                                                           | NO                                                              |
| Does the patient have crescendo (worsening) angina?                                                                                                     | NO                                                              |
| Does the pain radiate to the right arm or shoulder?                                                                                                     | NO                                                              |
| Did the patient vomit in association with the chest pain?                                                                                               | NO                                                              |
| Is the patient visibly sweating in the Emergency Department?                                                                                            | NO                                                              |
| Is the systolic blood pressure <100mmHg?                                                                                                                | NO                                                              |
| What is the high sensitivity cardiac troponin T result on arrival? (ng/L)                                                                               | 8                                                               |
| Estimated probability that the patient has ACS                                                                                                          | 1.8%                                                            |
| <b>RISK GROUP</b>                                                                                                                                       | <b>VERY LOW RISK</b>                                            |
| <b>Suggested disposition</b>                                                                                                                            | <b>Consider discharge</b>                                       |
| To discuss the availability of T-MACS calculators that could be used in the clinical environment, please contact the corresponding author, Richard Body |                                                                 |

Figure 1: Example of a very low risk patient

### T-MACS Rule Calculator (Example)

| T-MACS RULE CALCULATOR: INSERT DATA IN CELLS B5 TO B11                                                                                                  |                                                                 |
|---------------------------------------------------------------------------------------------------------------------------------------------------------|-----------------------------------------------------------------|
| The T-MACS model is designed to assist a clinician rather than being directive                                                                          |                                                                 |
| CAUTION: This example of a T-MACS calculator is for demonstration purposes and is not designed for clinical use                                         |                                                                 |
| INPUT (USE DROP DOWN LISTS AND ENTER NUMBER FOR TROPONIN LEVEL)                                                                                         |                                                                 |
| Is the ECG compatible with acute ischaemia? *                                                                                                           | NO                                                              |
| Does the patient have crescendo (worsening) angina?                                                                                                     | NO                                                              |
| Does the pain radiate to the right arm or shoulder?                                                                                                     | YES                                                             |
| Did the patient vomit in association with the chest pain?                                                                                               | NO                                                              |
| Is the patient visibly sweating in the Emergency Department?                                                                                            | NO                                                              |
| Is the systolic blood pressure <100mmHg?                                                                                                                | NO                                                              |
| What is the high sensitivity cardiac troponin T result on arrival? (ng/L)                                                                               | 10                                                              |
| Estimated probability that the patient has ACS                                                                                                          | 4.9%                                                            |
| <b>RISK GROUP</b>                                                                                                                                       | <b>LOW RISK</b>                                                 |
| <b>Suggested disposition</b>                                                                                                                            | <b>Consider serial troponin sampling in ED observation ward</b> |
| To discuss the availability of T-MACS calculators that could be used in the clinical environment, please contact the corresponding author, Richard Body |                                                                 |

**Figure 2: Example of a low risk patient**

| T-MACS Rule Calculator (Example)                                                                                                                        |                                                                        |
|---------------------------------------------------------------------------------------------------------------------------------------------------------|------------------------------------------------------------------------|
| T-MACS RULE CALCULATOR: INSERT DATA IN CELLS B5 TO B11                                                                                                  |                                                                        |
| <i>The T-MACS model is designed to assist a clinician rather than being directive</i>                                                                   |                                                                        |
| <b>CAUTION:</b> This example of a T-MACS calculator is for demonstration purposes and is not designed for clinical use                                  |                                                                        |
|                                                                                                                                                         | <b>INPUT (USE DROP DOWN LISTS AND ENTER NUMBER FOR TROPONIN LEVEL)</b> |
| Is the ECG compatible with acute ischaemia? *                                                                                                           | NO                                                                     |
| Does the patient have crescendo (worsening) angina?                                                                                                     | NO                                                                     |
| Does the pain radiate to the right arm or shoulder?                                                                                                     | NO                                                                     |
| Did the patient vomit in association with the chest pain?                                                                                               | YES                                                                    |
| Is the patient visibly sweating in the Emergency Department?                                                                                            | NO                                                                     |
| Is the systolic blood pressure <100mmHg?                                                                                                                | NO                                                                     |
| What is the high sensitivity cardiac troponin T result on arrival? (ng/L)                                                                               | 25                                                                     |
| Estimated probability that the patient has ACS                                                                                                          | 31.7%                                                                  |
| <b>RISK GROUP</b>                                                                                                                                       | <b>MODERATE RISK</b>                                                   |
| <b>Suggested disposition</b>                                                                                                                            | <b>Consider serial troponin testing in Acute Medical ward</b>          |
| To discuss the availability of T-MACS calculators that could be used in the clinical environment, please contact the corresponding author, Richard Body |                                                                        |

Figure 3: Example of a moderate risk patient

| T-MACS Rule Calculator (Example)                                                                                                                        |                                                                 |
|---------------------------------------------------------------------------------------------------------------------------------------------------------|-----------------------------------------------------------------|
| T-MACS RULE CALCULATOR: INSERT DATA IN CELLS B5 TO B11                                                                                                  |                                                                 |
| <i>The T-MACS model is designed to assist a clinician rather than being directive</i>                                                                   |                                                                 |
| CAUTION: This example of a T-MACS calculator is for demonstration purposes and is not designed for clinical use                                         |                                                                 |
|                                                                                                                                                         | INPUT (USE DROP DOWN LISTS AND ENTER NUMBER FOR TROPONIN LEVEL) |
| Is the ECG compatible with acute ischaemia? *                                                                                                           | YES                                                             |
| Does the patient have crescendo (worsening) angina?                                                                                                     | NO                                                              |
| Does the pain radiate to the right arm or shoulder?                                                                                                     | NO                                                              |
| Did the patient vomit in association with the chest pain?                                                                                               | NO                                                              |
| Is the patient visibly sweating in the Emergency Department?                                                                                            | YES                                                             |
| Is the systolic blood pressure <100mmHg?                                                                                                                | NO                                                              |
| What is the high sensitivity cardiac troponin T result on arrival? (ng/L)                                                                               | 50                                                              |
| Estimated probability that the patient has ACS                                                                                                          | 96.3%                                                           |
| <b>RISK GROUP</b>                                                                                                                                       | <b>HIGH RISK</b>                                                |
| <b>Suggested disposition</b>                                                                                                                            | <b>Refer to Cardiology</b>                                      |
| To discuss the availability of T-MACS calculators that could be used in the clinical environment, please contact the corresponding author, Richard Body |                                                                 |

Figure 4: Example of a high risk patient
